# Supplementary material
Source: Springer Nature journal article supplement (https://www.springermedizin.de/resource/supplementary/12889_2010_2396_MOESM2_ESM.pdf/9485670)
Supplement: MOESM2 [file 9485670]

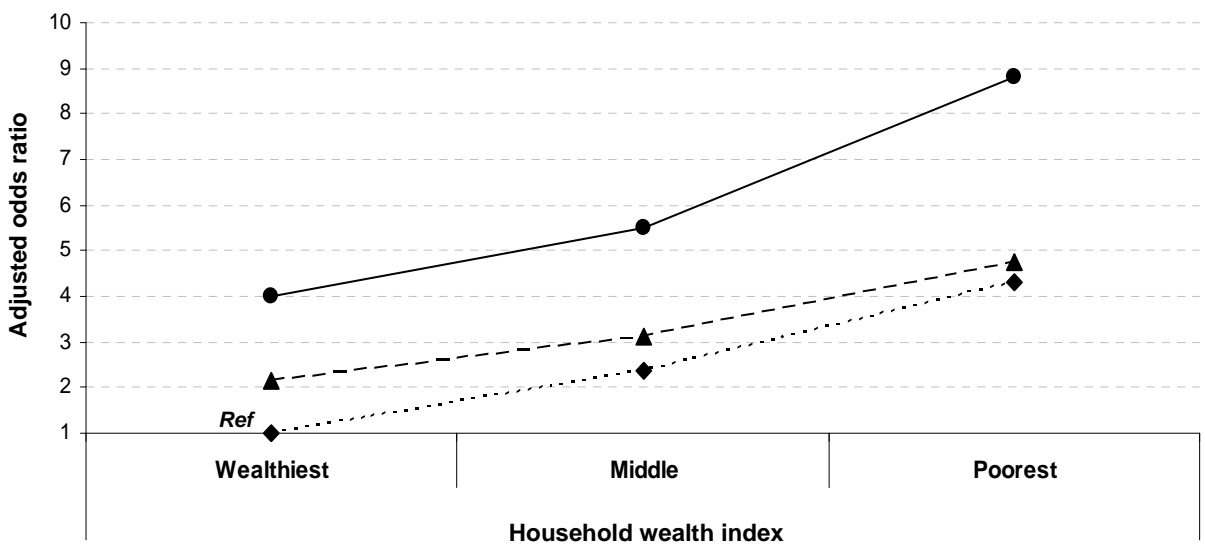

---◆--- Completed secondary education or higher

---▲--- Completed primary or some secondary education

—●— Incomplete primary education or none
